# Supplementary material for: Effect of Carrier-Gas on the Gas Sensing Performance of Co1-2xNixMnxFe2-yCeyO4 Double-Substitution Spinel to Flammable Gases and Volatile Organic Compounds
Source: Preprints.org preprint supplement (doi:10.20944/preprints202308.2198.v1), 2023-08-31
Supplement: Supplementary file 1 [file supplementary]

**Effect of Carrier-Gas on the Sensitivity of Co1-2xNixMnxFe2-yCeyO4 Double-Substitution Spinel to Flammable Gases and Volatile Organic Compounds**

Sunday A. Ogundipea, Ceboliyazakha L. Ndlangamandlaa, Gumani E. Mphaphulid, David E. Motaungc, Hendrik C. Swartc, Steven S. Nkosie[[1]](#footnote-1)

aDepartment of Physics, University of Zululand, Private Bag X1001, KwaDlangezwa ZA3886, South Africa

bDepartment of Chemistry, University of Zululand, Private Bag X1001, KwaDlangezwa ZA3886, South Africa

cDepartment of Physics, University of the Free State, Box 339, Bloemfontein, ZA9300, South Africa

dNational Metrology Institute of South Africa (NMISA), CSIR Campus, Building 5, Meiring Naude Road, Brummeria, Pretoria, ZA0182, South Africa

eDepartment of Physics, University of Limpopo, Private Bag X1106, Sovenga, ZA0727, South Africa


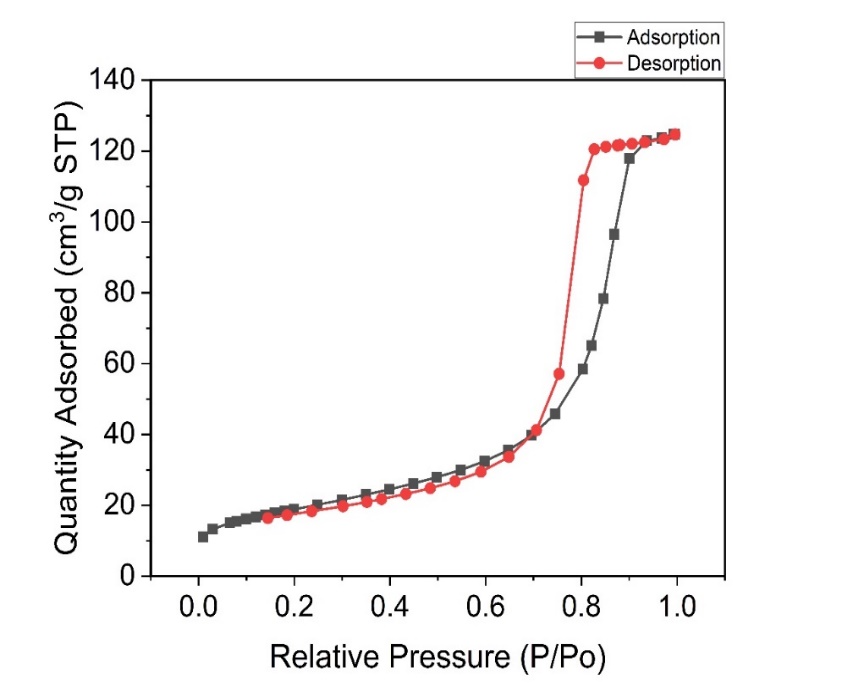

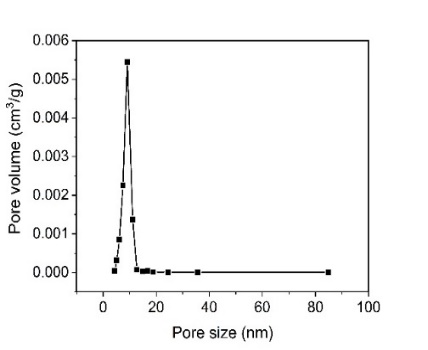


**(a)**


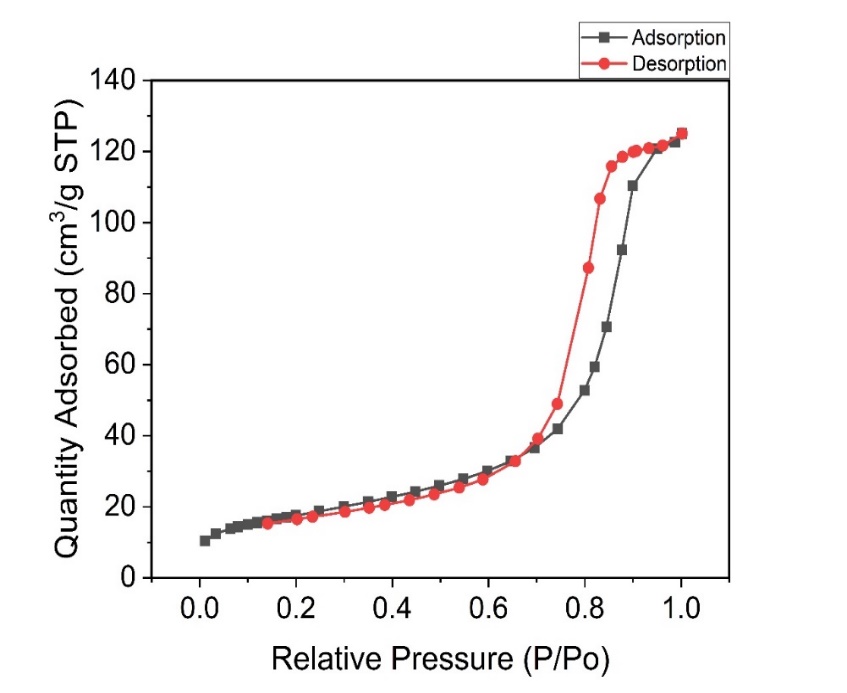

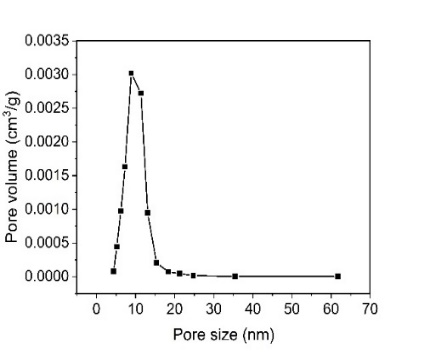


**(b)**


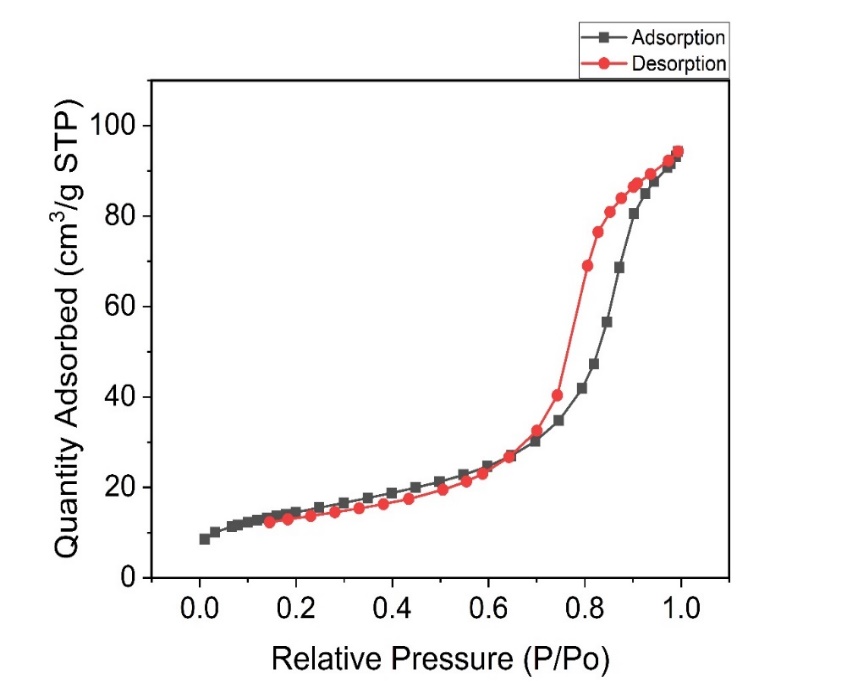

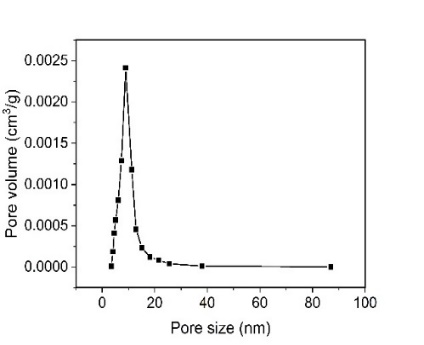


**(c)**


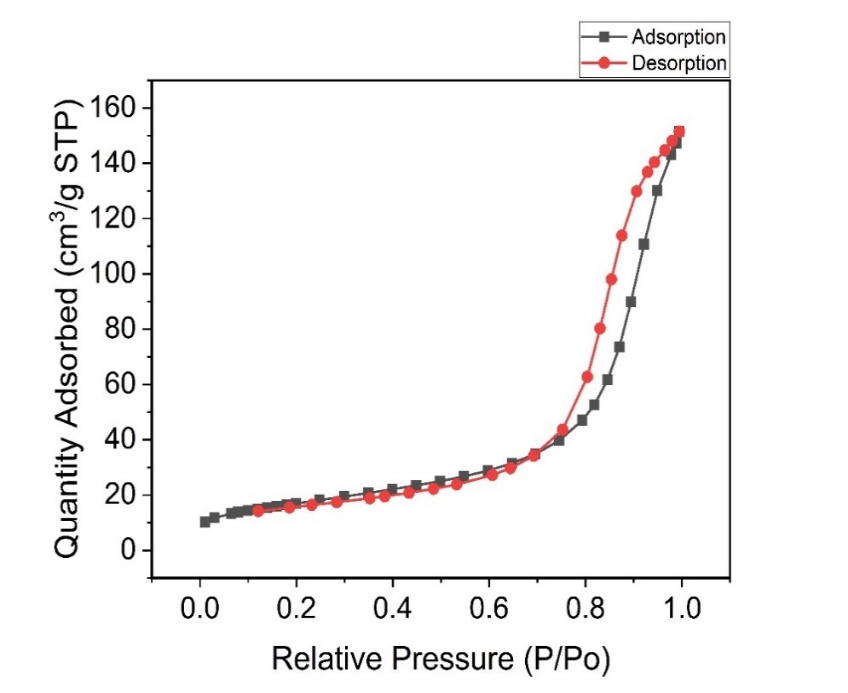

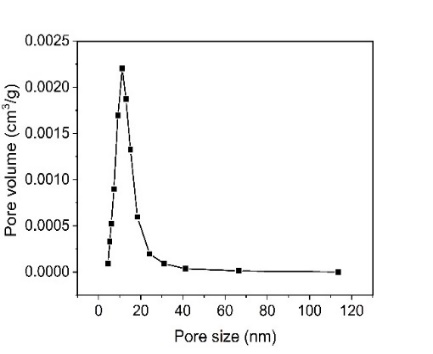


**(d)**

**Figure S1**. Nitrogen adsorption-desorption isotherms of Co1-2xNixMnxFe2-yCeyO4 samples with (a) x = y = 0: dried with infrared lamp, (b) x = y = 0: dried naturally, (c) x = y = 0.2 and (d) x = y = 0.3. **Insets**: The corresponding pore size distribution.


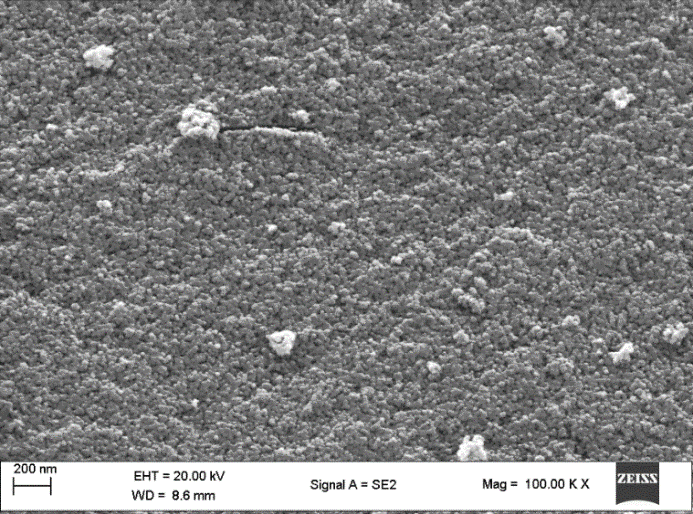


**200 nm**

**(a)**


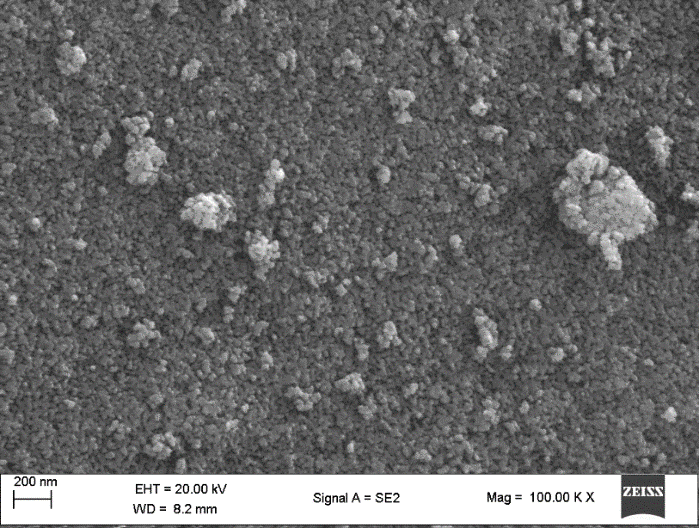


**(b)**

**200 nm**

200 nm


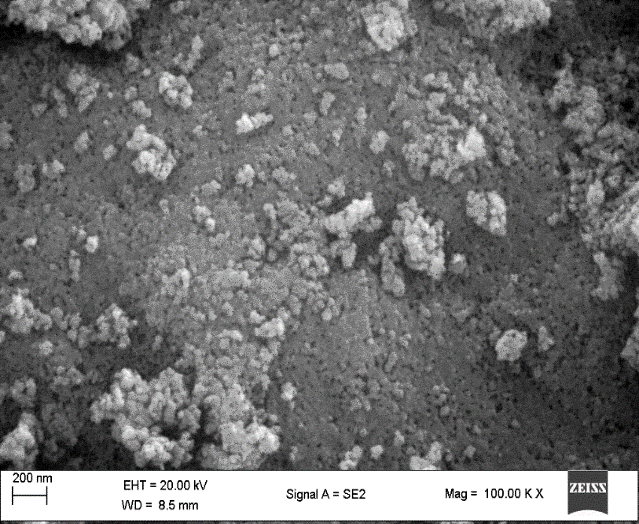


**(c)**

**200 nm**


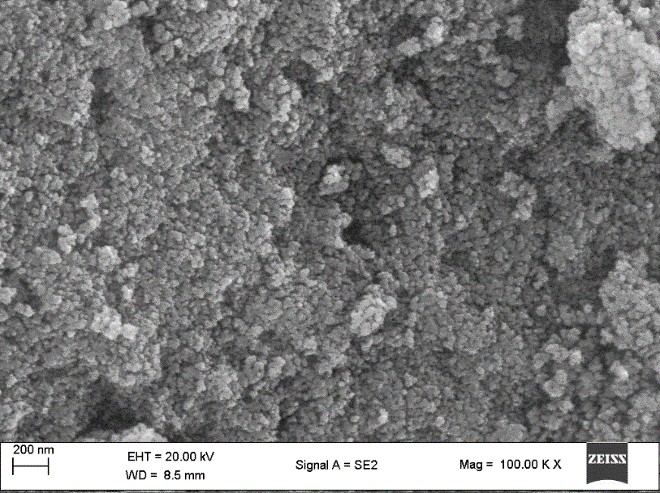


**(d)**

**200 nm**

**Figure S2**. SEM images of the Co1-2xNixMnxFe2-yCeyO4 samples with (a) x = y = 0: dried with infrared lamp, (b) x = y = 0: dried naturally, (c) x = y = 0.2 and (d) x = y = 0.3.


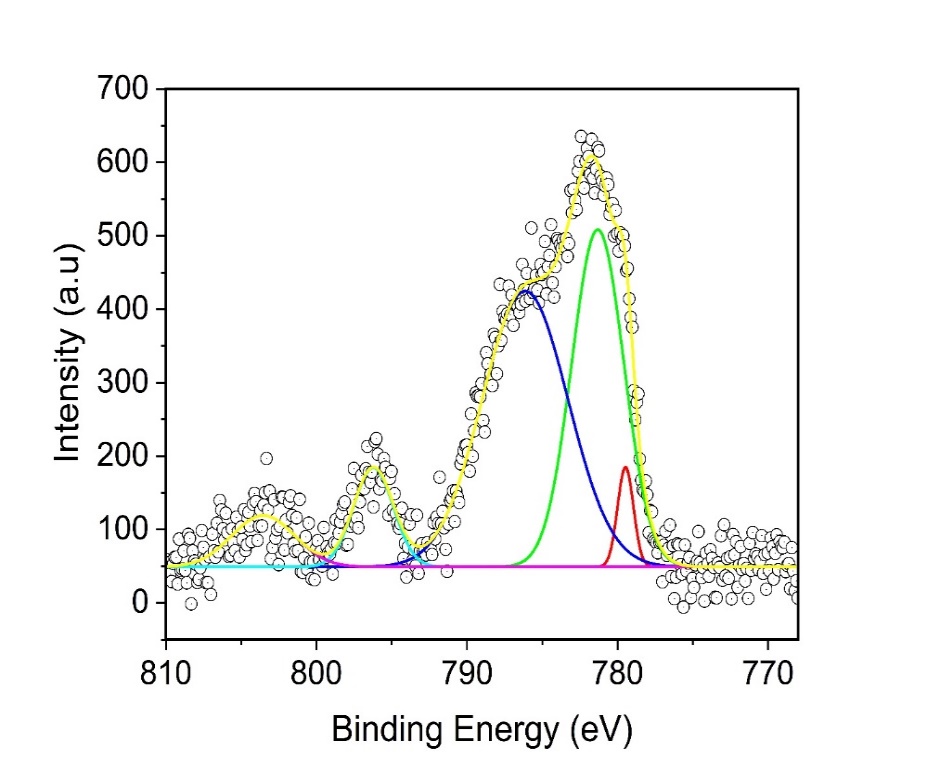


Co 2p scan


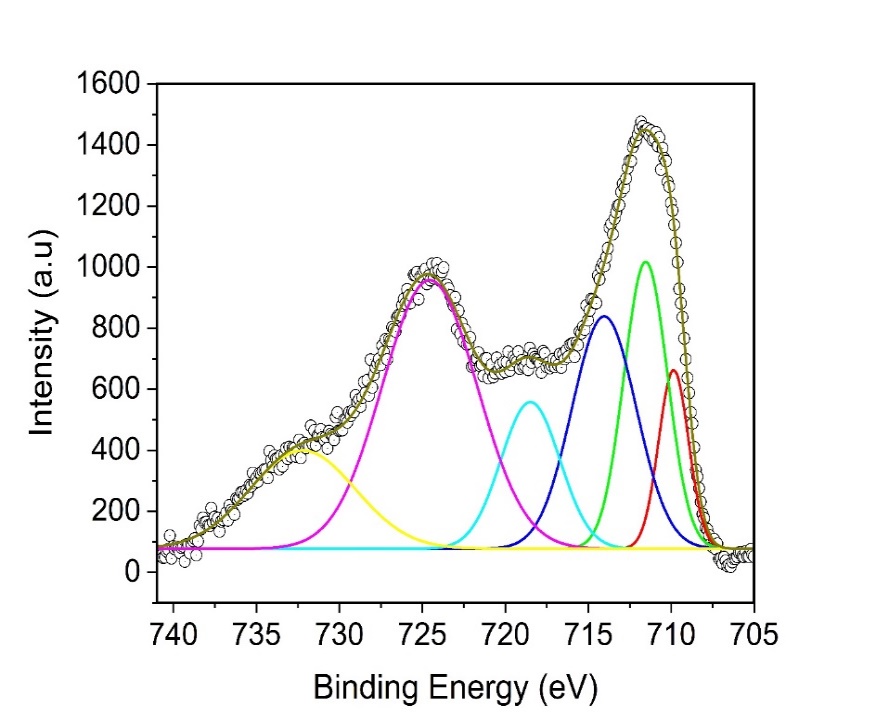


Fe 2p scan

B-site Co2+

A-site Co2+

Co 2p1/2

satellite

Co 2p1/2

Co 2p3/2

B-site Fe3+

A-site Fe3+

B-site Fe3+

satellite

A-site Fe3+

satellite

Fe 2p3/2

Fe 2p1/2

Fe 2p1/2 satellite


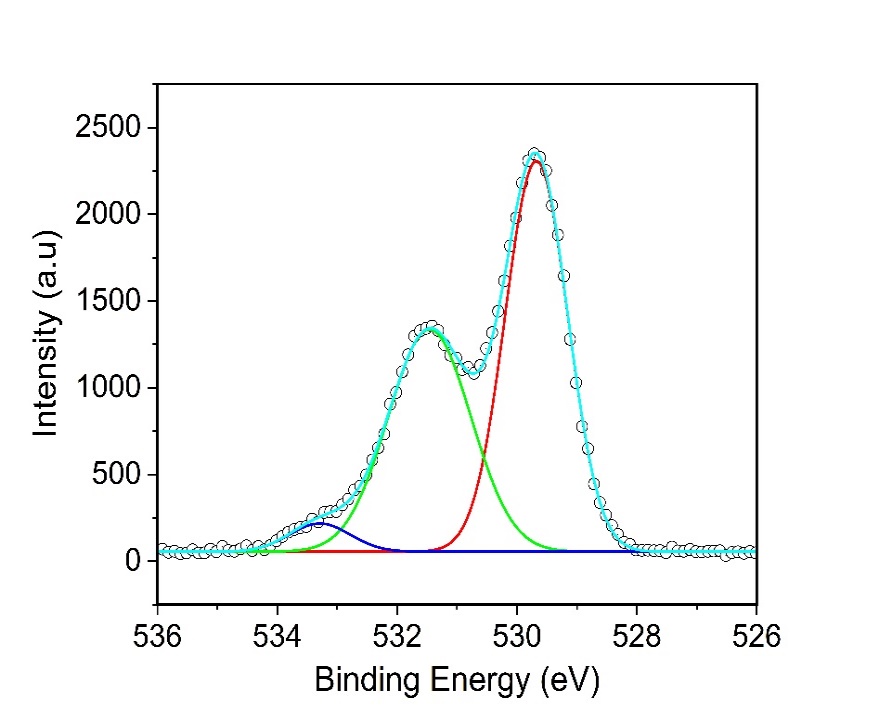


O1s scan

529.68 eV

531.46 eV

533.24 eV

B-site Co2+

satellite

**(b)**

**(c)**


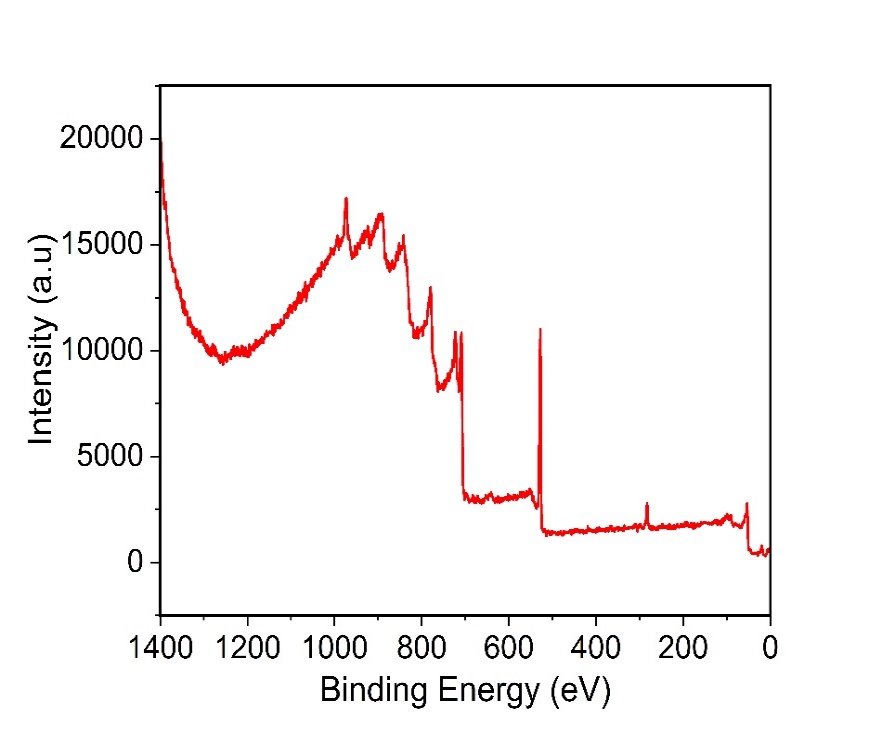


Fe3p

Co3s

C1s

O1s

Co2p

Fe2p

Co2s

Co LMM

O KLL

**(a)**

Survey scan

**(d)**

**Figure S3**.(a) Survey spectrum, before sputtering, of CoFe2O4 samples. XPS spectra of Co1-2xNixMnxFe2-yCeyO4 sample for which x = y = 0 (lamp-dried): (b) Co 2p scan, (c) Fe 2p scan, and (d) O 1s scan.


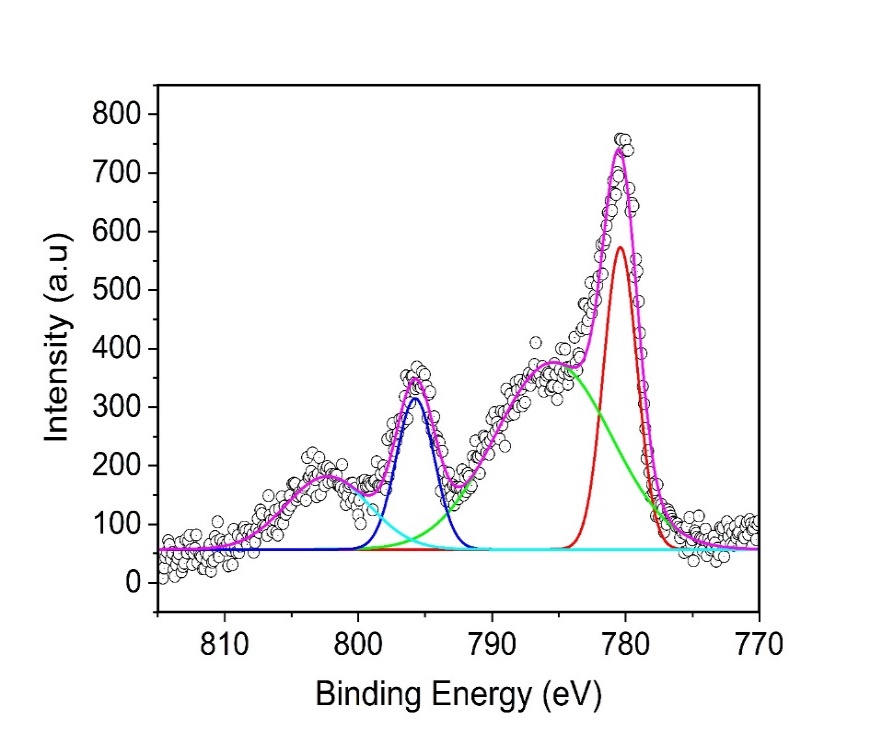


Co 2p scan


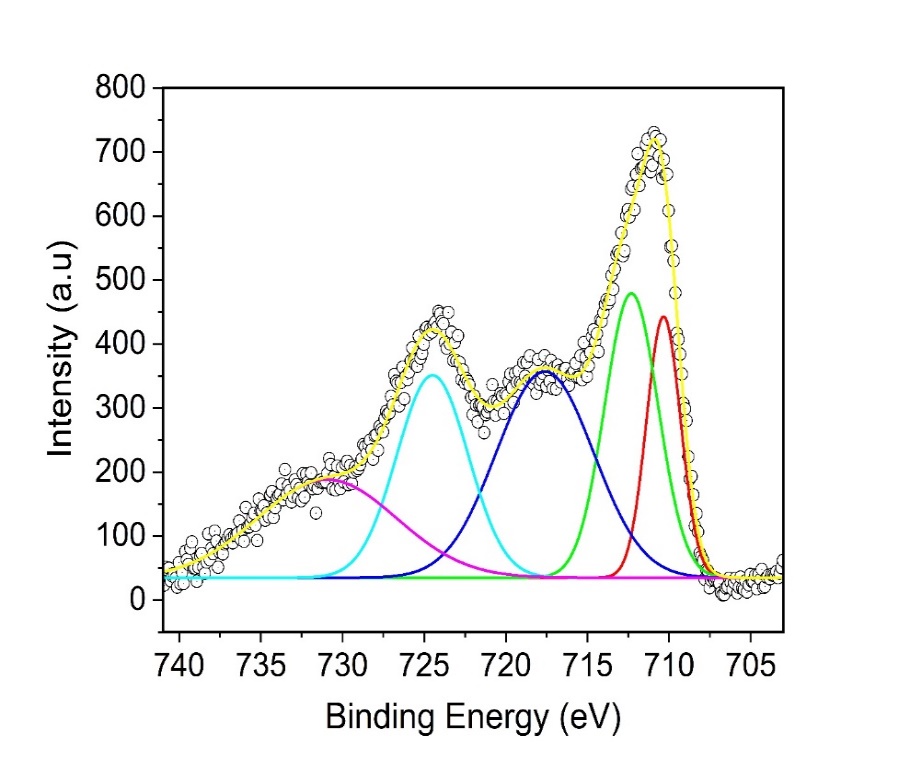


Fe 2p scan


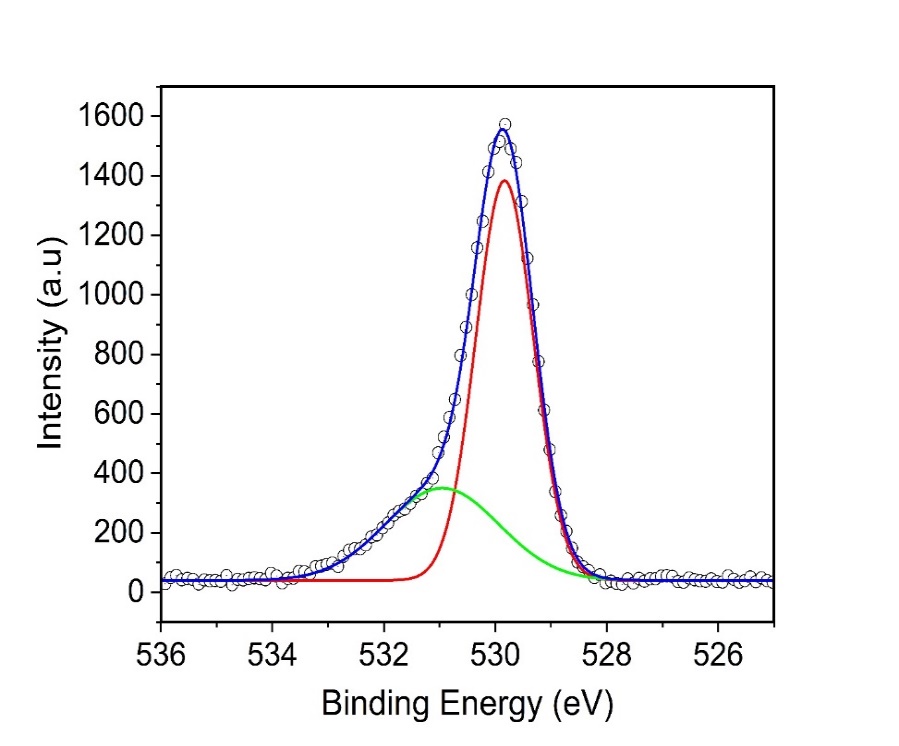


O 1s scan

529.84 eV

530.93 eV

B-site Fe3+

A-site Fe3+

A-site Fe3+

satellite

Fe 2p1/2

Fe 2p1/2 satellite

Fe 2p3/2

Co 2p1/2

satellite

Co 2p1/2

B-site Co2+

Co 2p3/2

B-site Co2+

satellite

**(b)**

**(c)**

**(d)**


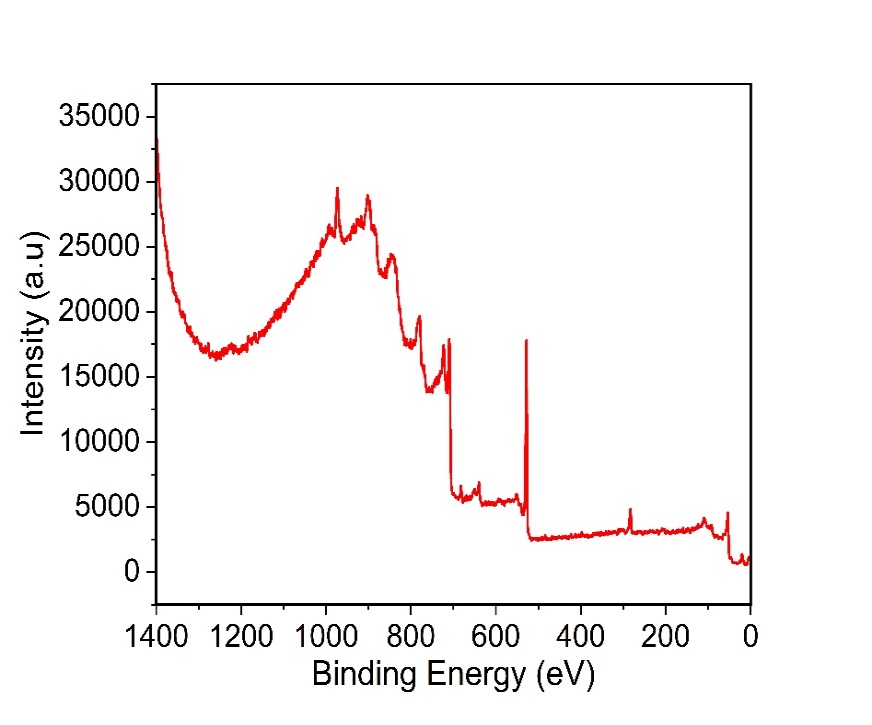


Survey scan

**(a)**

Fe3p

Co3s

C1s

O1s

Mn2p

Fe2p

Co2p

Ni2p

Ce3d

Co2s

Ni2s

**Figure S4**.(a) Survey spectrum, before sputtering, of Co1-2xNixMnxFe2-yCeyO4 samples. XPS spectra of Co1-2xNixMnxFe2-yCeyO4 sample for which x = y = 0 (natural-dried): (b) Co 2p scan, (c) Fe 2p scan, and (d) O 1s scan.


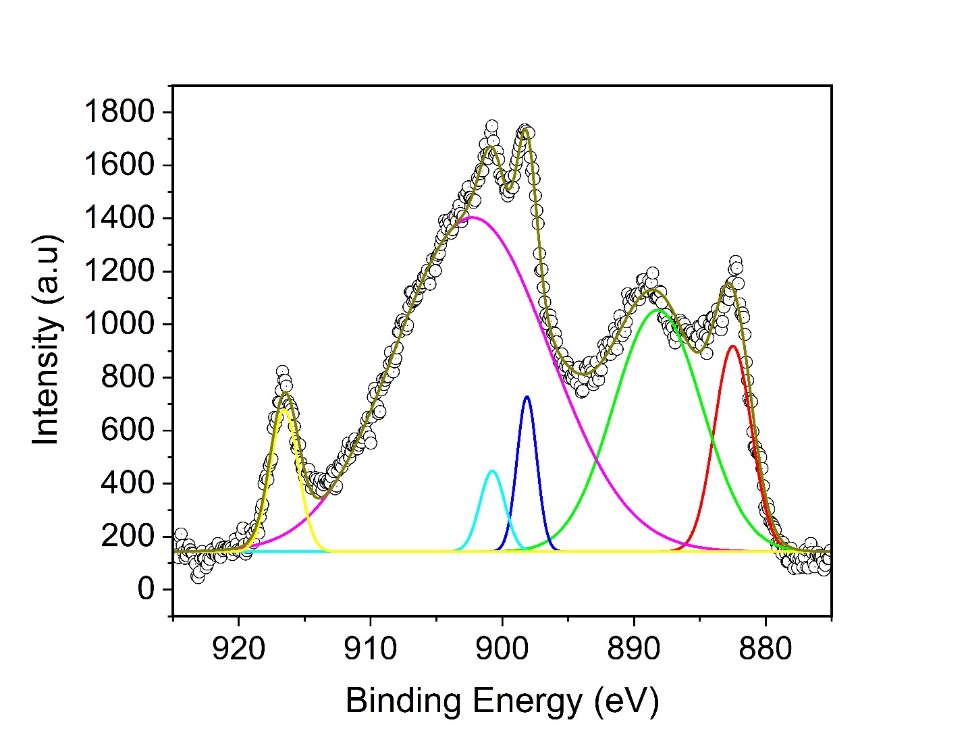


Ce 3d scan


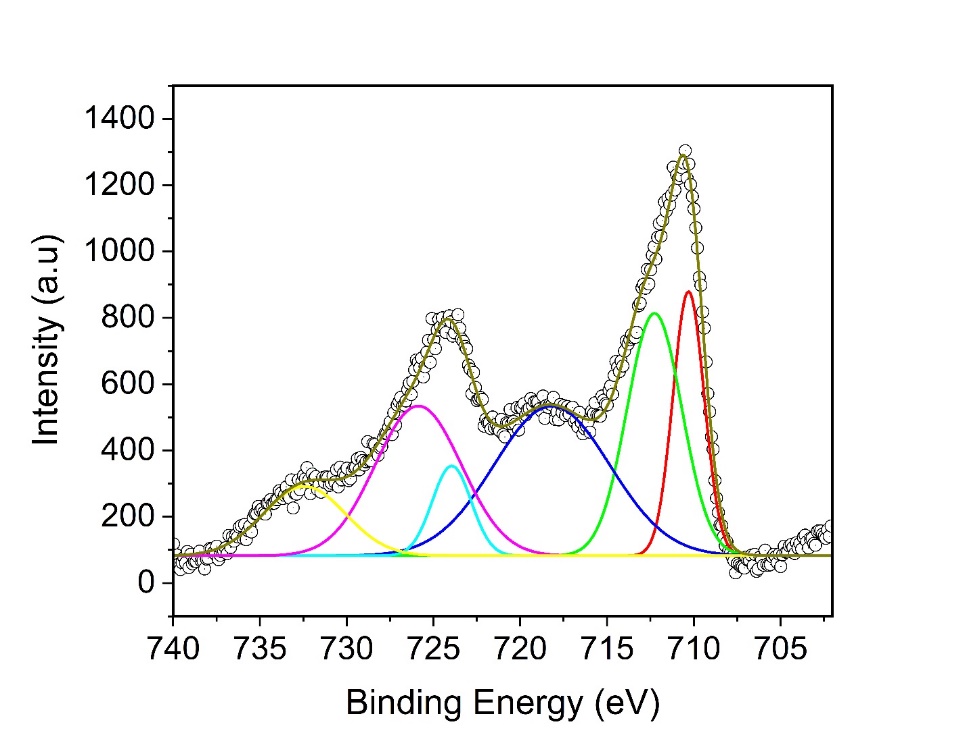


Fe 2p scan


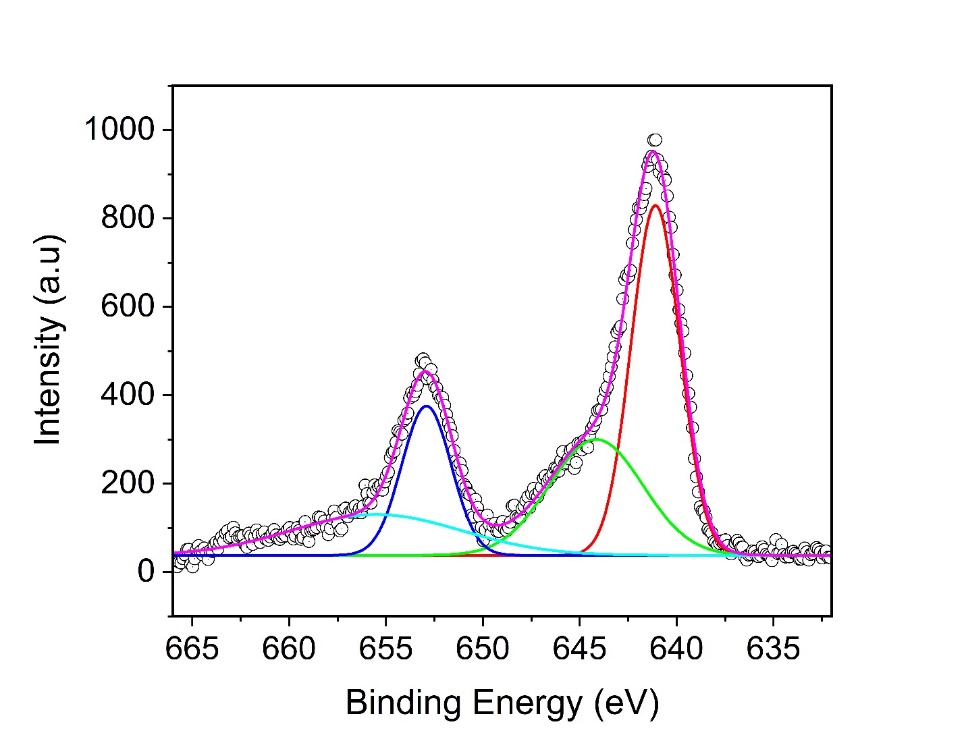


Mn 2p scan


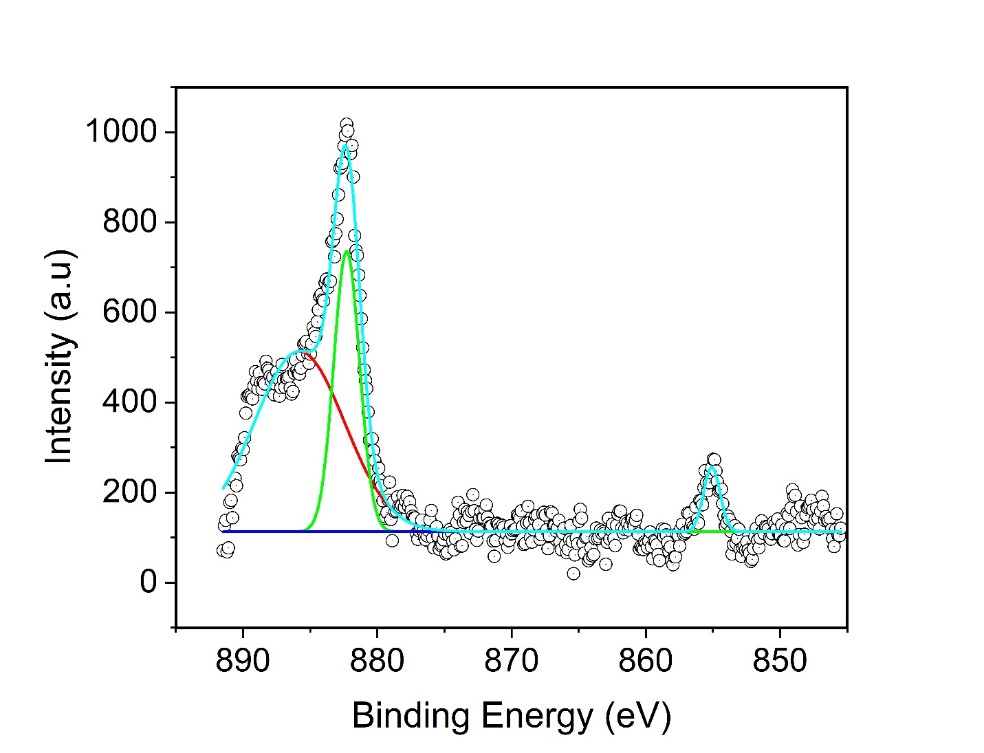


Ni 2p scan


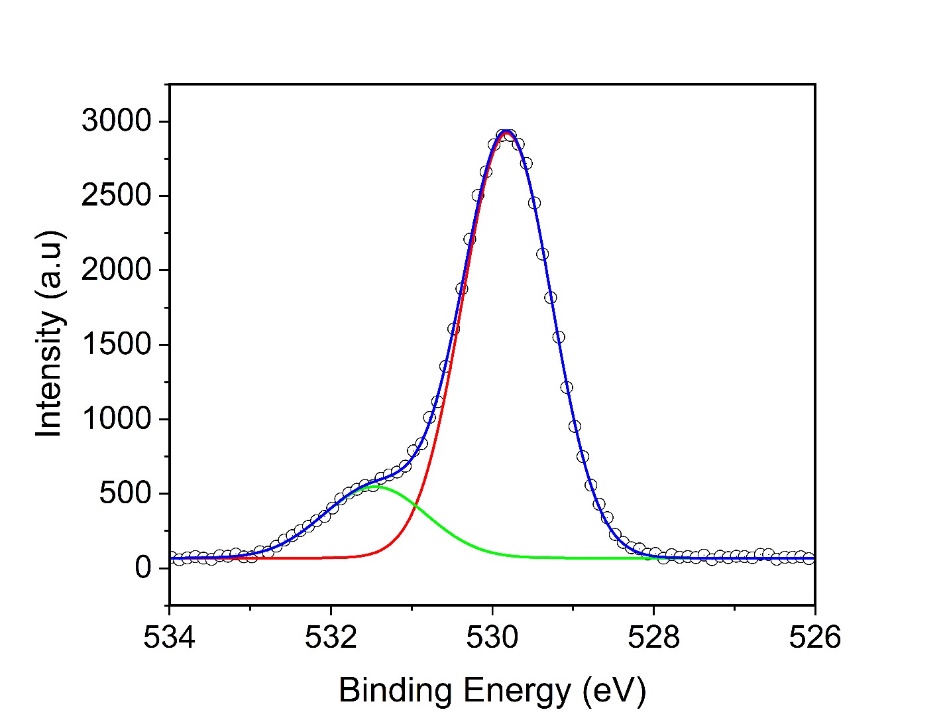


O 1s scan

529.81 eV

531.39 eV


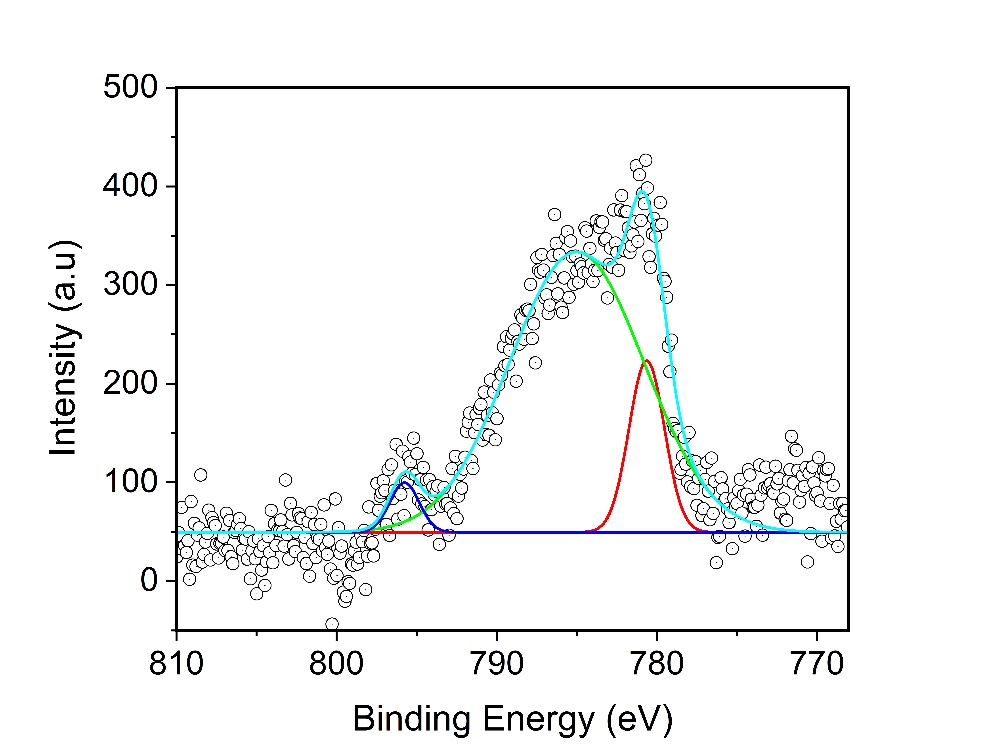


Co 2p scan

B-site Co2+

B-site Co2+

satellite

Co 2p1/2

Co 2p3/2

Ni 2p1/2

Ni 2p3/2

B-site Fe3+

A-site

Fe3+

A-site Fe3+

satellite

B-site Fe3+

A-site

Fe 3+

Fe 2p1/2 satellites

Fe 2p3/2

Fe 2p1/2

Mn 2p1/2

Mn 2p1/2 satellite

Mn 2p3/2 satellite

Mn 2p3/2

*v*

*vʹ*

*vʹʹ*

*vʹʹʹ*

*u*

*vʹʹʹʹ*

**(a)**

**(b)**

**(c)**

**(d)**

**(e)**

**(f)**

**Figure S5**:XPS spectra of Co1-2xNixMnxFe2-yCeyO4 sample for which x = y = 0.2: (a) Co 2p scan, (b) Ni 2p scan, (c) Mn 2p scan (d) Ce 3d scan, (e) Fe 2p scan, and (f) O 1s scan.


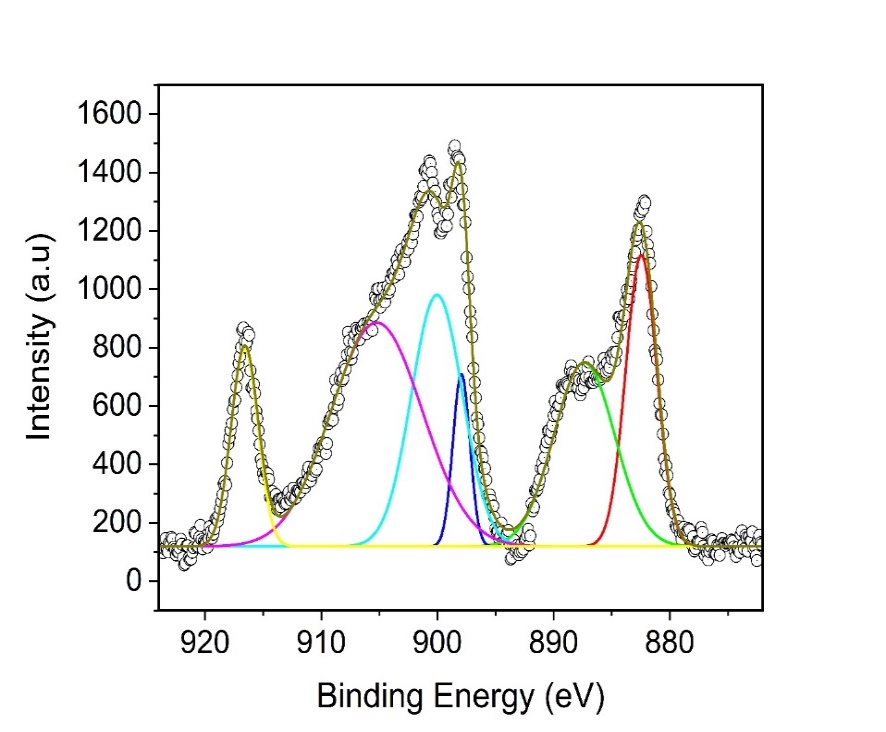


Ce 3d scan


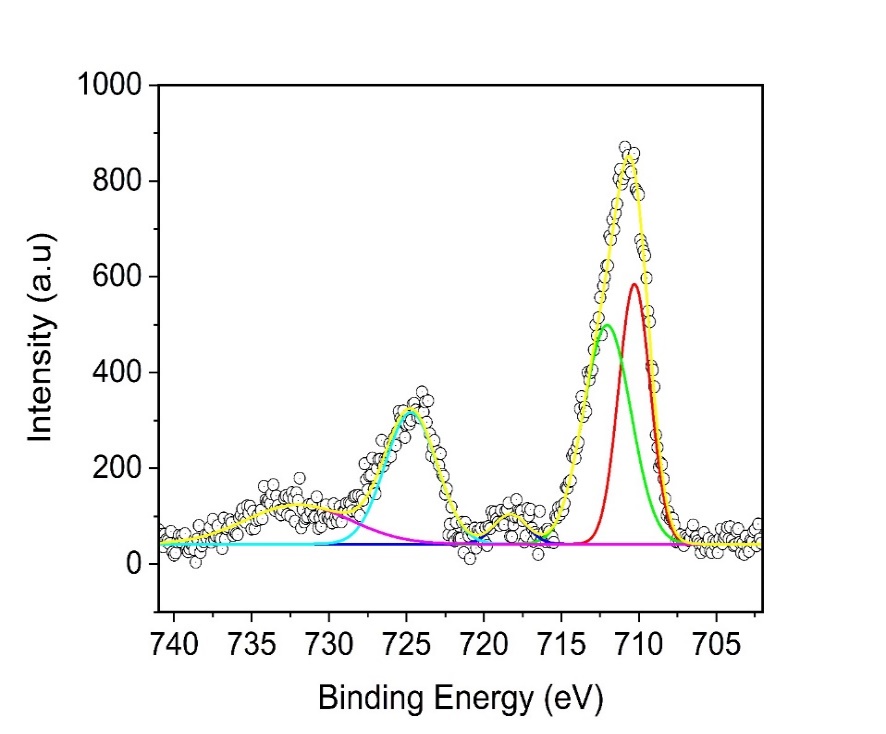


Fe 2p scan


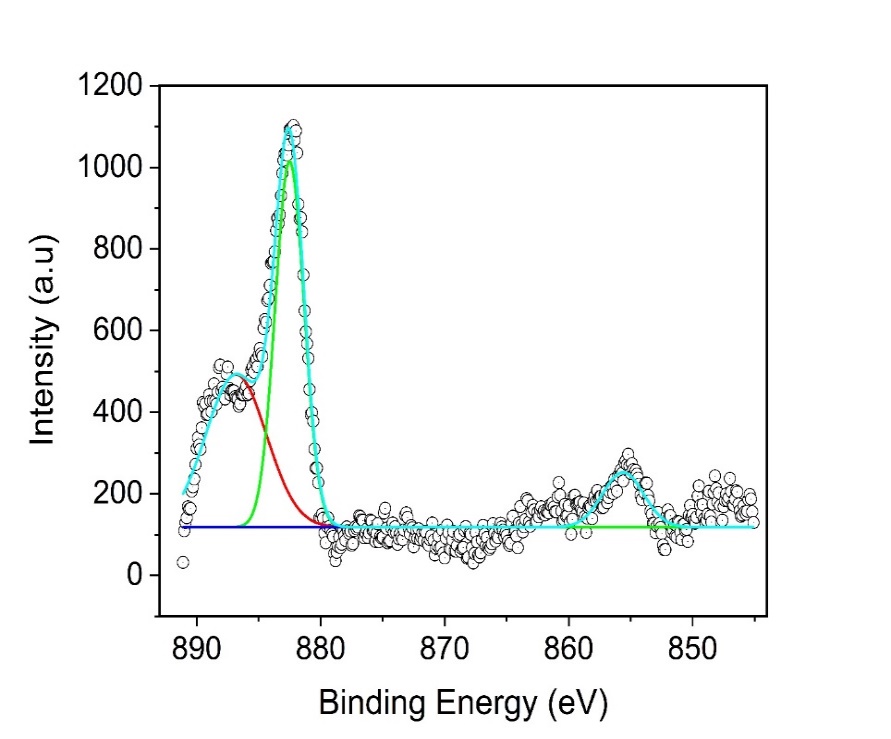


Ni 2p scan


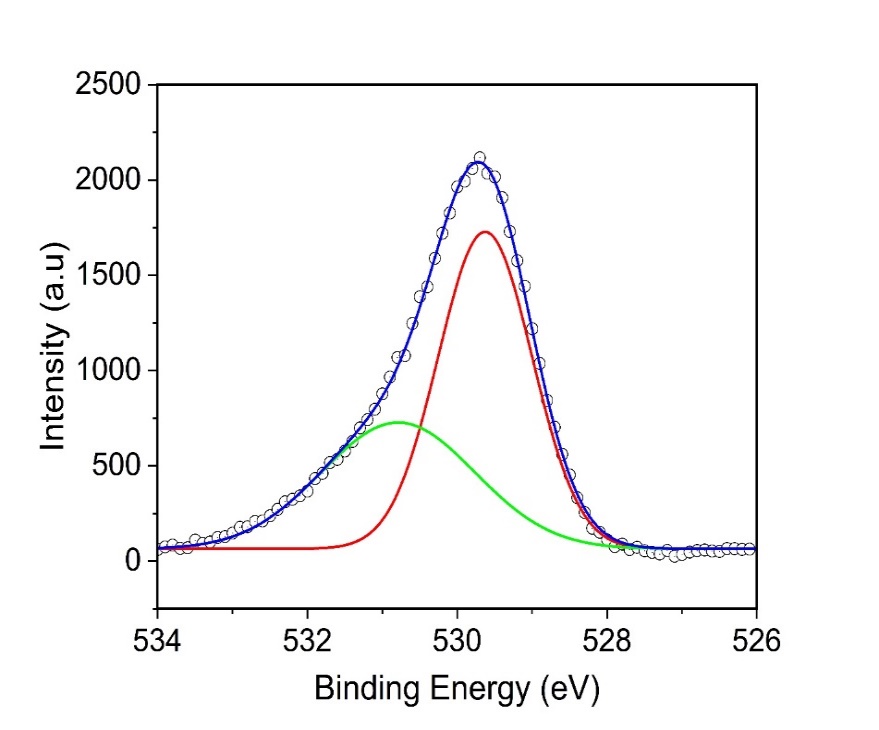


O 1s scan


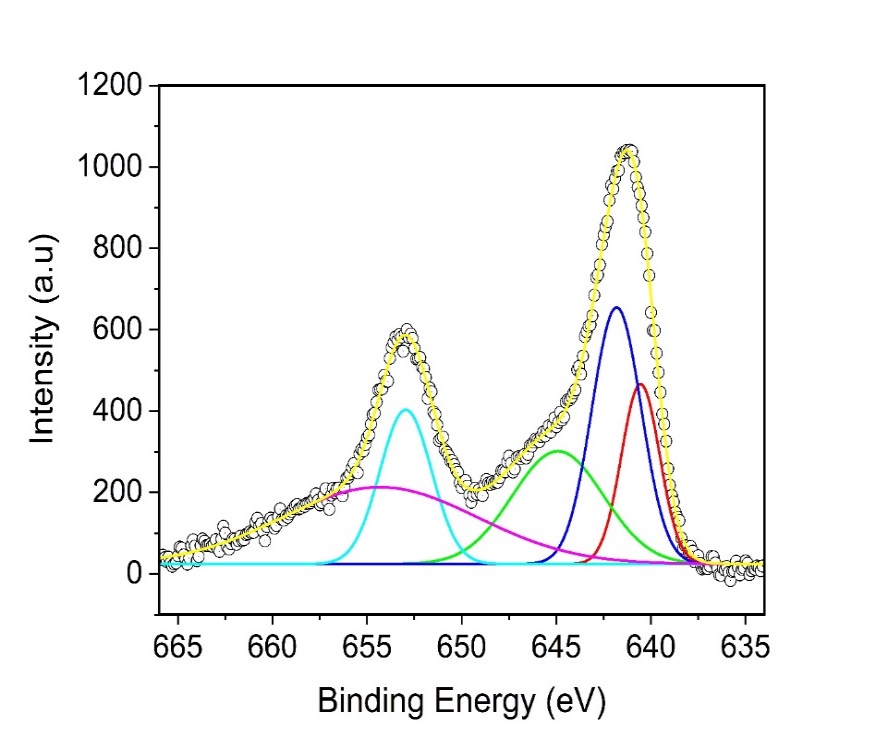


Mn 2p scan

529.62 eV

530.77 eV


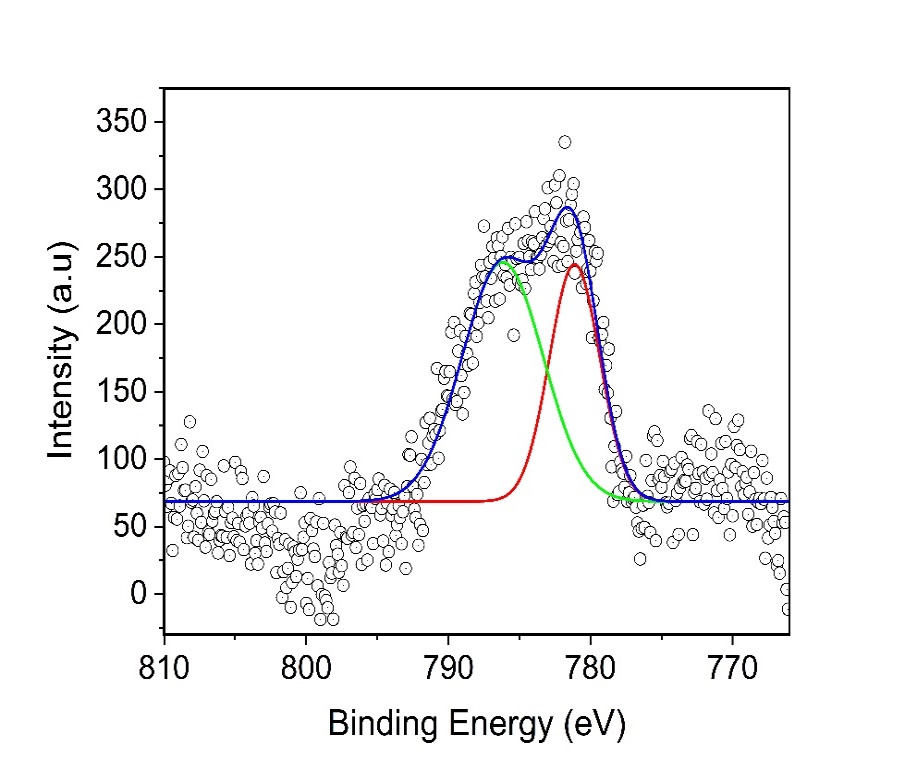


Co 2p scan

Co 2p3/2

B-site Co2+

B-site Co2+

satellite

Ni 2p3/2

Ni 2p1/2

B-site Fe3+

A-site

Fe3+

A-site Fe3+

satellite

Fe 2p1/2

Fe 2p1/2 satellite

Fe 2p3/2

Mn2+

Mn3+

Mn 2p3/2

Mn 2p3/2 satellite

Mn 2p1/2

Mn 2p1/2 satellite

*v*

*vʹ*

*vʹʹ*

*vʹʹʹ vʹʹʹʹ*

*u*

*vʹʹʹʹ*

*ʹ*

**(a)**

**(b)**

**(c)**

**(d)**

**(e)**

**(f)**

**Figure S6**.XPS spectra of Co1-2xNixMnxFe2-yCeyO4 sample for which x = y = 0.3: (a) Co 2p scan, (b) Ni 2p scan, (c) Mn 2p scan (d) Ce 3d scan, (e) Fe 2p scan, and (f) O 1s scan

**Table S1**: Fitting peaks in Figures S5(d) and S6(d) and the responsible cations

| Peak | cation |
| --- | --- |
| V | Ce4+ |
| V’ | Ce4+ |
| V’’ | Ce4+ |
| V’’’ | Ce4+ |
| V’’’’ | Ce4+ |
| U | Ce3+ |

1. Corresponding author. Department of Physics, University of Limpopo, Private Bag X1106, Sovenga, ZA0727, South Africa. *E-mail address:* [steven.solethu.nkosi@gmail.com](mailto:steven.solethu.nkosi@gmail.com) (S.S. Nkosi) [↑](#footnote-ref-1)
